# Supplementary material for: Conductive MOFs as bifunctional oxygen electrocatalysts for all-solid-state Zn–air batteries
Source: Royal Society of Chemistry journal article supplement (doi:10.1039/d0cc05569g), 2020-01-01
Supplement: d0cc05569g1.pdf [file d0cc05569g1.pdf]

*Supporting Information for*

**Conductive MOFs as Bifunctional Oxygen Electrocatalysts for All-solid-state Zn-air battery†**

Na Pan, Hanwen Zhang, Bo Yang, Hui Qui, Longyan Li, Li Song\* and Mingdao Zhang<sup>a\*</sup>

---

<sup>a.</sup> *Department of Chemistry, Jiangsu Key Laboratory of Atmospheric Environment Monitoring and Pollution Control, School of Environmental Science and Engineering, Nanjing University of Information Science & Technology, Nanjing 210044, Jiangsu, P. R. China. E-mail: songli@nuist.edu.cn; matchlessjimmy@163.com.*

# Experimental

## 1. Materials and measurements

All chemicals and reagents were commercially available and used as purchased without further purification.

Scanning electron microscopy (SEM) images were obtained on a Zeiss\_Supra55 microscope. The samples were tested by X-ray diffraction (XRD) on a XRD-6100 with Cu K $\alpha$  radiation ( $\lambda=1.5418$  Å) for the phase analysis. High resolution transmission electron microscopy (HRTEM) and Energy dispersive X-ray spectrometer (EDS) elemental mapping scans were recorded on a Tecnai G2 F30 S-TWIN. X-ray photoelectron spectroscopy (XPS) analysis was carried out using a Thermo Scientific ESCALAB 250Xi X-ray photoelectron spectrometer. The electrical conductivities of the resultant catalysts were measured at room temperature using a four-point probe method by ST2722 and ST2643.

## 2. Synthesis method of conductive MOFs

Preparation of conductive MOF by hydrothermal according to the process in reference.<sup>S1</sup>

The typical experiment for  $[\text{Ni}_6(\text{HHTP})_3(\text{H}_2\text{O})_x]_n$  was performed as follows: A solid mixture of HHTP (7 mg) and  $\text{Ni}(\text{OAc})_2 \cdot 4\text{H}_2\text{O}$  (10 mg) was dissolved in deionized water (4.0 mL) in a 8-mL glass vial. The reaction mixture was heated in an isothermal oven at 85°C for 12 h resulting in small dark blue crystals. The reaction mixture was allowed to cool naturally to room temperature and the crystals were washed with deionized water (3 $\times$ 5 mL), and then acetone (3 $\times$ 5 mL). The purity of the  $[\text{Ni}_6(\text{HHTP})_3(\text{H}_2\text{O})_x]_n$  product has been confirmed by PXRD analysis and by scanning electron microscopy (SEM) images.

Synthesis method of Ru-doped conductive MOFs as follows: Firstly, the  $\text{RuCl}_3$  solution was formulated to 0.4 mg/mL when used; Secondly, generate the reaction solution according to the dosage in Table S1, and processing method is the same as  $[\text{Ni}_6(\text{HHTP})_3(\text{H}_2\text{O})_x]_n$ .

Table S1 The composition of reactants.

|                                                                                                           | HHTP | Ni(OAc) <sub>2</sub> ·4H <sub>2</sub> O | RuCl <sub>3</sub> (0.4 mg/mL) | Deionized water |
|-----------------------------------------------------------------------------------------------------------|------|-----------------------------------------|-------------------------------|-----------------|
| [Ni <sub>5.94</sub> Ru <sub>0.06</sub> (HHTP) <sub>3</sub> (H <sub>2</sub> O) <sub>x</sub> ] <sub>n</sub> | 7 mg | 9.9 mg                                  | 0.21 mL                       | 3.79 mL         |
| [Ni <sub>5.82</sub> Ru <sub>0.18</sub> (HHTP) <sub>3</sub> (H <sub>2</sub> O) <sub>x</sub> ] <sub>n</sub> | 7 mg | 9.7 mg                                  | 0.63 mL                       | 3.37 mL         |
| [Ni <sub>5.7</sub> Ru <sub>0.3</sub> (HHTP) <sub>3</sub> (H <sub>2</sub> O) <sub>x</sub> ] <sub>n</sub>   | 7 mg | 9.5 mg                                  | 1.05 mL                       | 2.95 mL         |
| [Ni <sub>5.4</sub> Ru <sub>0.6</sub> (HHTP) <sub>3</sub> (H <sub>2</sub> O) <sub>x</sub> ] <sub>n</sub>   | 7 mg | 9.0 mg                                  | 2.1 mL                        | 1.9 mL          |

### 3 Electrochemical characterizations

The electrocatalytic performance of the conductive MOFs for ORR and OER was investigated with a three-electrode cell on CHI760E electrochemical workstation. The electrocatalytic experiments was using a three-electrode setup. A rotating glassy-carbon-disk electrode (GC-RDE) coated with catalyst layers was used as the working electrode. When preparing the catalyst ink, 5 mg catalyst and 40  $\mu$ L of 5% Nafion were dispersed in 960  $\mu$ L H<sub>2</sub>O and ultrasonicated for 30 min to obtain a homogenous suspension. 10  $\mu$ L of the ink was dropped onto the GC-RDE with a surface area of 0.1256 cm<sup>2</sup>. A Pt wire and an Hg/HgO electrode were used as the counter and the reference electrodes, respectively. The electrochemical experiments were carried out in O<sub>2</sub>/N<sub>2</sub> saturated 0.1 M KOH electrolyte for ORR/OER. Cyclic voltammetry (CV) curves for the ORR evaluation were recorded by applying a linear potential scan at a sweep rate of 10 mV s<sup>-1</sup> after purging O<sub>2</sub> or N<sub>2</sub> gas for 30 min.

n is the number of electrons transferred per oxygen molecule, the n can also be determined from RRDE measurements on the basis of the disk current (I<sub>d</sub>) and ring current (I<sub>r</sub>) via the following equation:  $n=4NI_d/(NI_d+I_r)$ , where N is current collection

efficiency of the Pt ring, 0.37. And all of the potentials and voltages are iR corrected, and calibrated and converted to reversible hydrogen electrode. To gain further insights into understanding of the activity enhancement, the electrochemical active surface area (ECSA) of different catalysts were estimated by calculating the double layer capacitance (C<sub>dl</sub>) based on cyclic voltammetry (CV) curves in a non-Faradaic region (0.95 ~ 1.05 V, V<sub>s</sub> RHE).

#### 4 Zn-air batteries

The gas-diffusion layer was prepared by bought from Fuel cell materials retail store. Ni foams were carefully washed with a 1 M HCl solution and then rinsed with absolute ethanol and distilled water to remove any oxides on the surface.

The catalyst (5 mg) and 5% Nafion (50  $\mu$ L) were dispersed into 950  $\mu$ L solution (H<sub>2</sub>O : ethanol=1:1, v/v) by sonication. The resulted inks were carefully dropped from above onto respective Ni foams and gas-diffusion layer and then kept in a vacuum container for 30 min.

The Zn-air battery was assembled with a Zn anode (zinc powder), 6 M KOH solution (mixed with 0.2 M Zn(OAc)<sub>2</sub> for rechargeable Zn-air batteries), and an air cathode comprising a catalyst layer and gas-diffusion layer that was used as a backing layer next to the Ni foam-based catalyst layer to prevent electrolyte leakage.

Assembly and test of solid-state Zn-air battery. The solid-state Zn-air battery was fabricated in a sandwich structure. Particularly, a zinc powder, a catalyst-supported air diffusion layer, and mixture of polyvinyl alcohol (PVA) KOH and Zn(OAc)<sub>2</sub> were used as anode, cathode and solid electrolyte, respectively. The mass loading of [Ni<sub>5.7</sub>Ru<sub>0.3</sub>(HHTP)<sub>3</sub>(H<sub>2</sub>O)<sub>x</sub>]<sub>n</sub> is 2 mg/cm<sup>2</sup> for solid rechargeable air electrode. The battery property of the single cell primary and secondary Zn-air battery was tested by LAND battery test system (Wuhan LAND Electronics Ltd.).

The gel electrolyte was prepared as follows: 1 g PVA powder was added into 10 mL H<sub>2</sub>O. The mixture was stirred at 95 °C for 2 h. After the solution was transferred into

transparent state, 1 mL of 18 M KOH containing 0.02 M zinc acetate was added into the mixture. After being stirred for 40 min, the gel was poured into a container and froze at -20 °C for 2 h. The gel electrolyte was obtained after thawing at room temperature.

## 5 Additional Figures for conductive MOFs

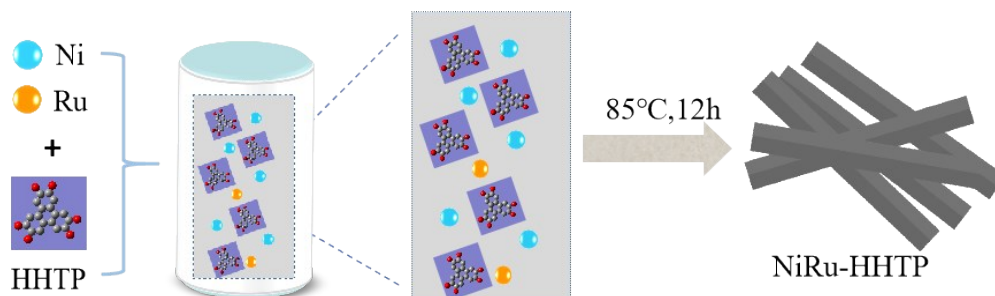

**Fig. S1.** Synthesis method of conductive MOF.

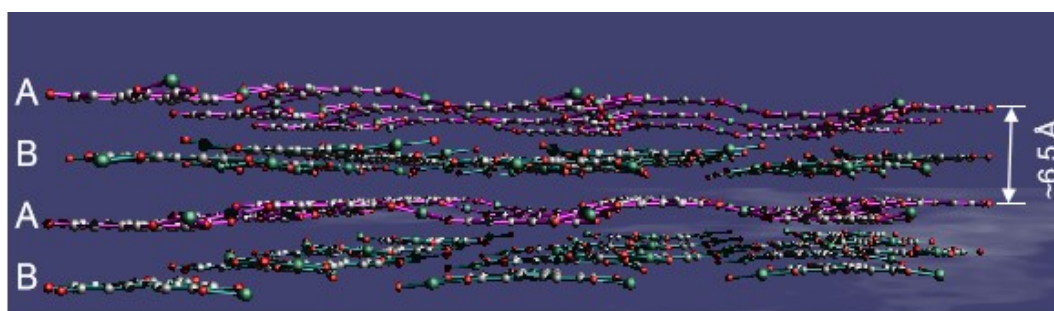

**Fig. S2.** View of the two extended corrugated layers along the [110] direction.

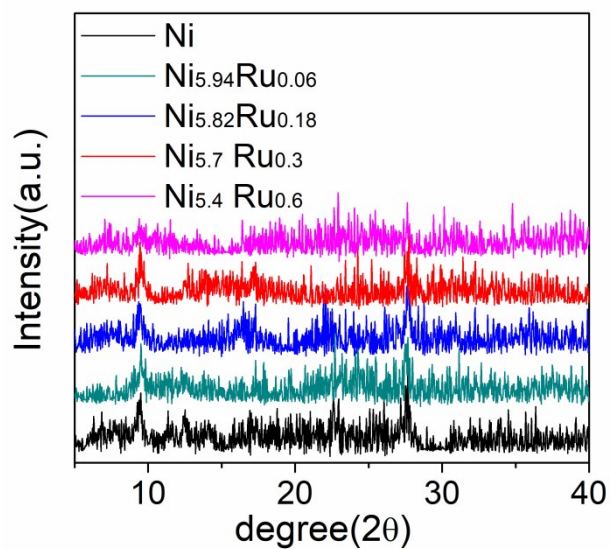

**Fig. S3.** XRD of five samples.

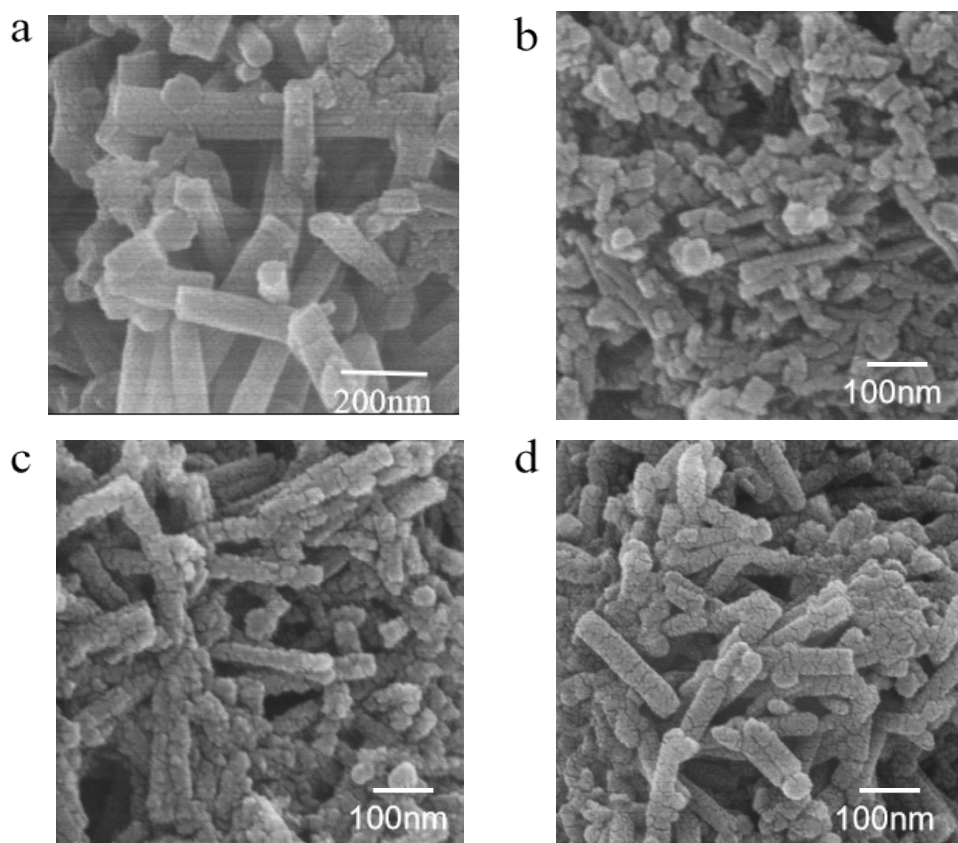

**Fig. S4.** SEM of (a)  $[\text{Ni}_6(\text{HHTP})_3(\text{H}_2\text{O})_x]_n$ ; (b)  $[\text{Ni}_{5.94}\text{Ru}_{0.06}(\text{HHTP})_3(\text{H}_2\text{O})_x]_n$ ; (c)  $[\text{Ni}_{5.82}\text{Ru}_{0.18}(\text{HHTP})_3(\text{H}_2\text{O})_x]_n$ ; (d)  $[\text{Ni}_{5.4}\text{Ru}_{0.6}(\text{HHTP})_3(\text{H}_2\text{O})_x]_n$ .

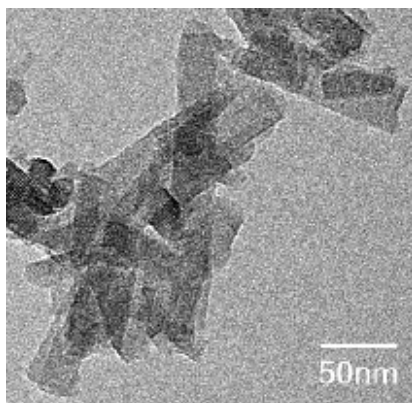

**Fig. S5.** HRTEM at low magnifications of  $[\text{Ni}_{5.7}\text{Ru}_{0.3}(\text{HHTP})_3(\text{H}_2\text{O})_x]_n$ .

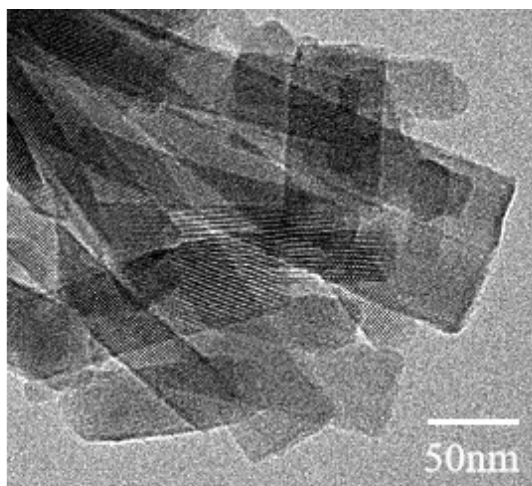

**Fig. S6.** TEM of  $[\text{Ni}_6(\text{HHTP})_3(\text{H}_2\text{O})_x]_n$ .

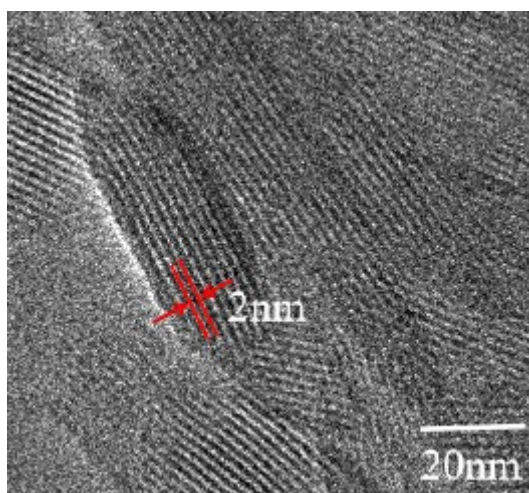

**Fig. S7.** HRTEM of  $[\text{Ni}_6(\text{HHTP})_3(\text{H}_2\text{O})_x]_n$ .



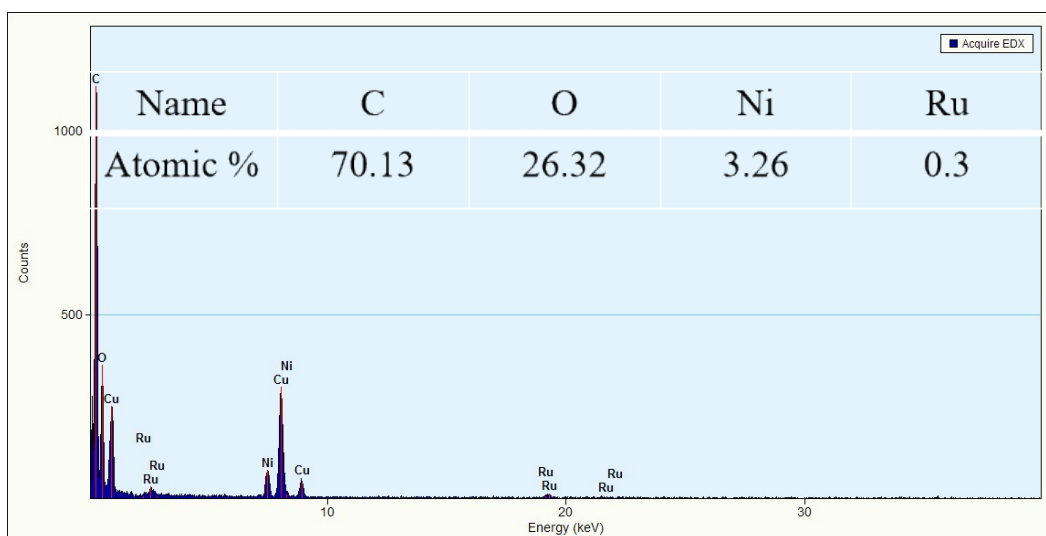

**Fig. S8.** EDX of  $[\text{Ni}_{5.7}\text{Ru}_{0.3}(\text{HHTP})_3(\text{H}_2\text{O})_x]_n$ .

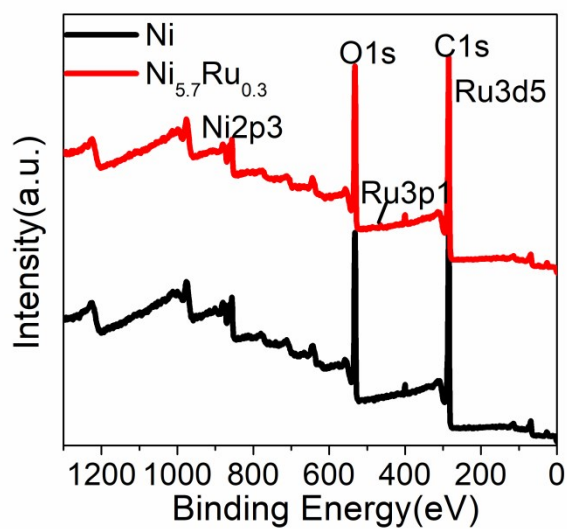

**Fig. S9.** XPS spectra for  $[\text{Ni}_{5.7}\text{Ru}_{0.3}(\text{HHTP})_3(\text{H}_2\text{O})_x]_n$  and  $[\text{Ni}_6(\text{HHTP})_3(\text{H}_2\text{O})_x]_n$ .

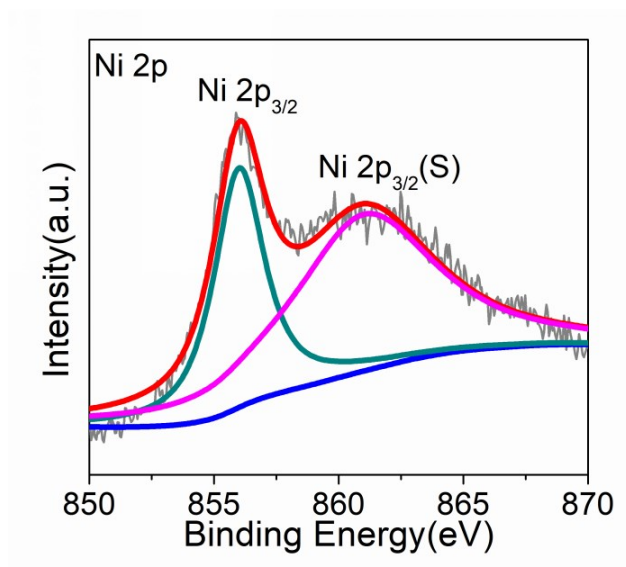

**Fig. S10.** High-resolution Ni2p XPS spectra for  $[\text{Ni}_{5.7}\text{Ru}_{0.3}(\text{HHTP})_3(\text{H}_2\text{O})_x]_n$ .

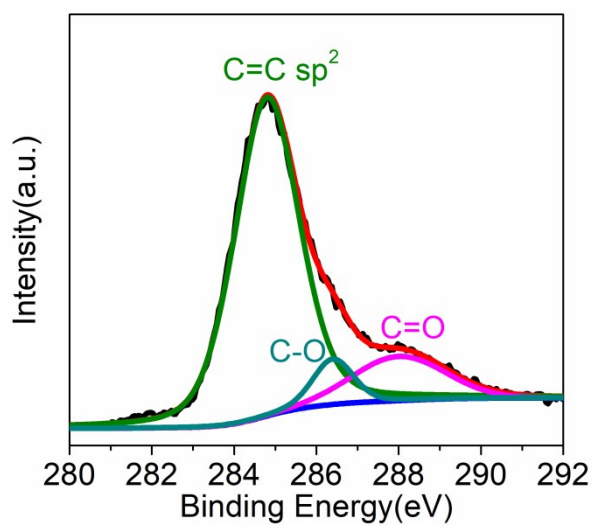

**Fig. S11.** High-resolution C1s XPS spectra for  $[\text{Ni}_{5.7}\text{Ru}_{0.3}(\text{HHTP})_3(\text{H}_2\text{O})_x]_n$ .

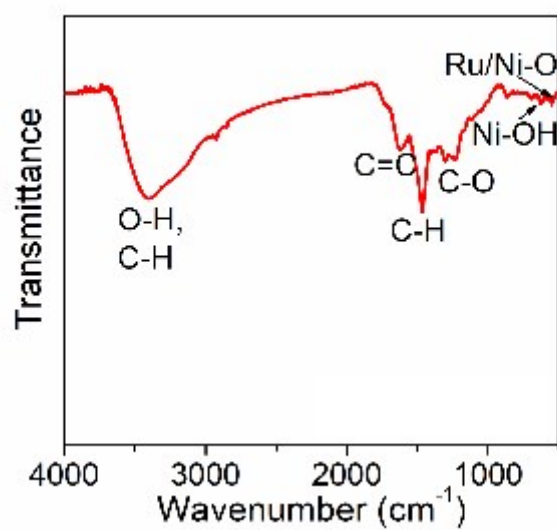

**Fig. S12.** FTIR spectra for  $[\text{Ni}_{5.7}\text{Ru}_{0.3}(\text{HHTP})_3(\text{H}_2\text{O})_x]_n$ .

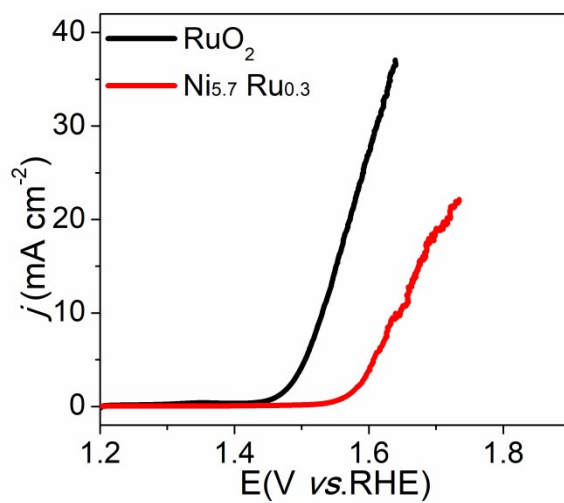

**Fig. S13.** Compare of  $[\text{Ni}_{5.7}\text{Ru}_{0.3}(\text{HHTP})_3(\text{H}_2\text{O})_x]_n$  and  $\text{RuO}_2$  for OER, all of the potentials are iR corrected.

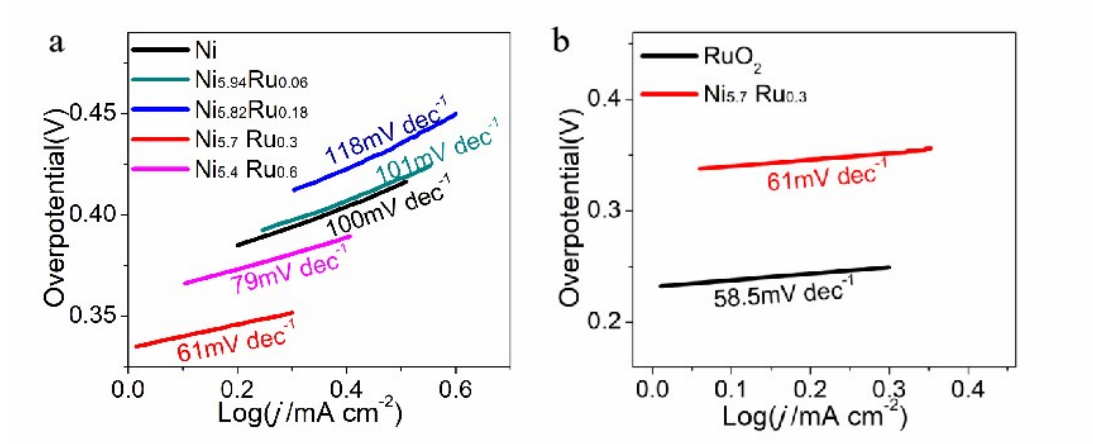

**Fig. S14.** The Tafel slope of five samples and RuO<sub>2</sub> for OER.

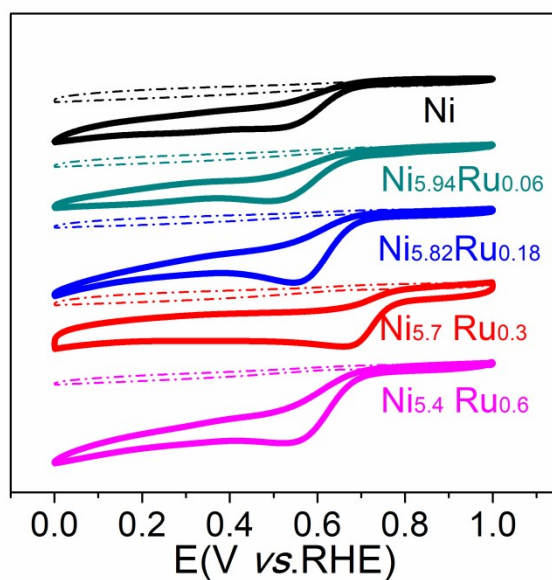

**Fig. S15.** CV profiles recorded in O<sub>2</sub>-saturated (solid) and N<sub>2</sub>-saturated (dotted) 0.1M KOH solution.

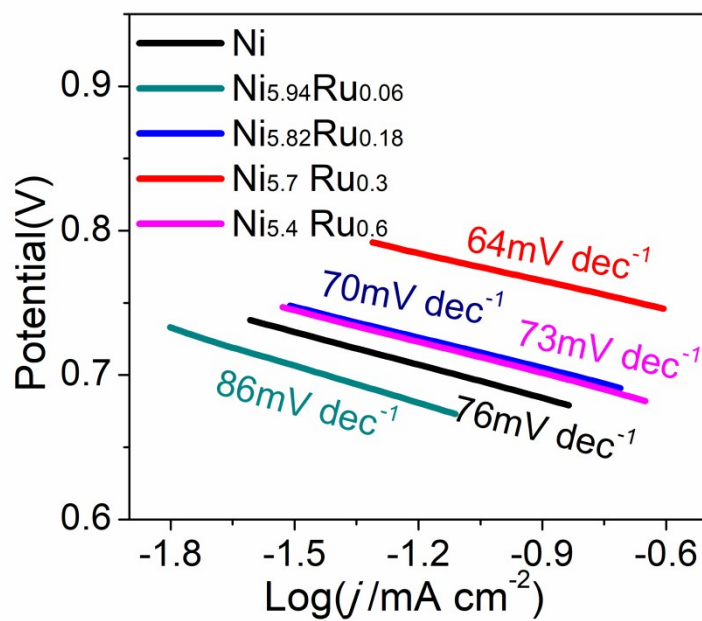

**Fig. S16.** Tafel slopes of five samples for ORR.

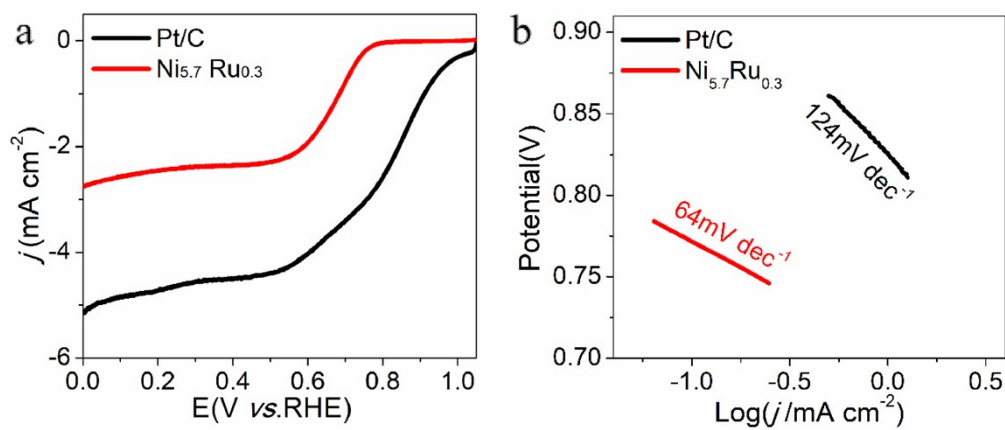

**Fig. S17.** Compare of  $[\text{Ni}_{5.7}\text{Ru}_{0.3}(\text{HHTP})_3(\text{H}_2\text{O})_x]_n$  and Pt/C for ORR.

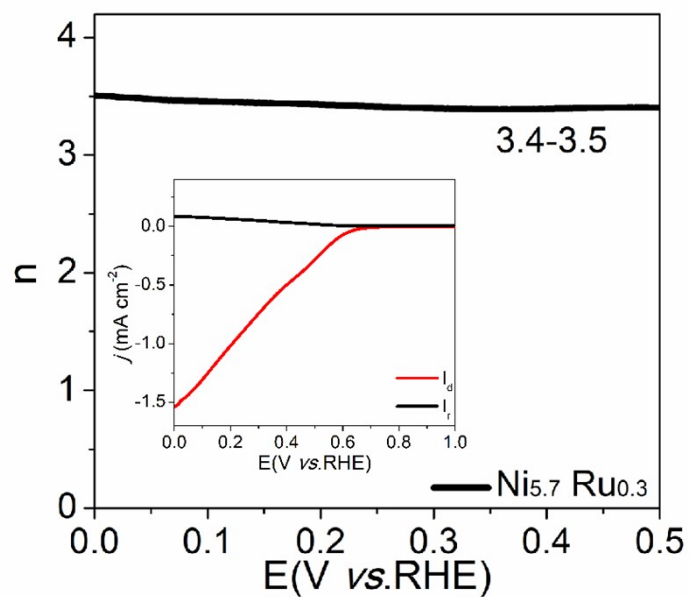

**Fig. S18.** The electron transfer numbers of  $[\text{Ni}_{5.7}\text{Ru}_{0.3}(\text{HHTP})_3(\text{H}_2\text{O})_x]_n$  for ORR.

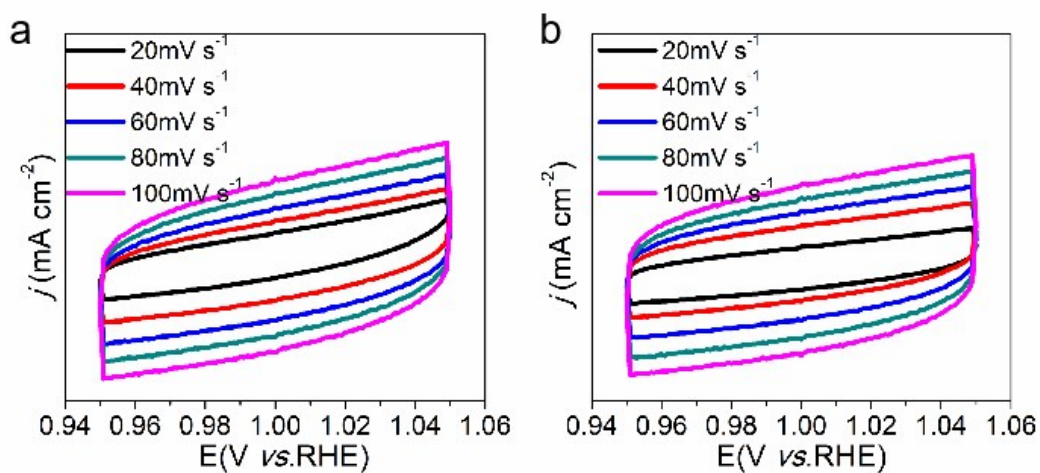

**Fig. S19.** Cyclic voltammetry (CV) graph of a)  $[\text{Ni}_6(\text{HHTP})_3(\text{H}_2\text{O})_x]_n$ , b)  $[\text{Ni}_{5.7}\text{Ru}_{0.3}(\text{HHTP})_3(\text{H}_2\text{O})_x]_n$  at various scan rates (20 - 100  $\text{mV s}^{-1}$ ).

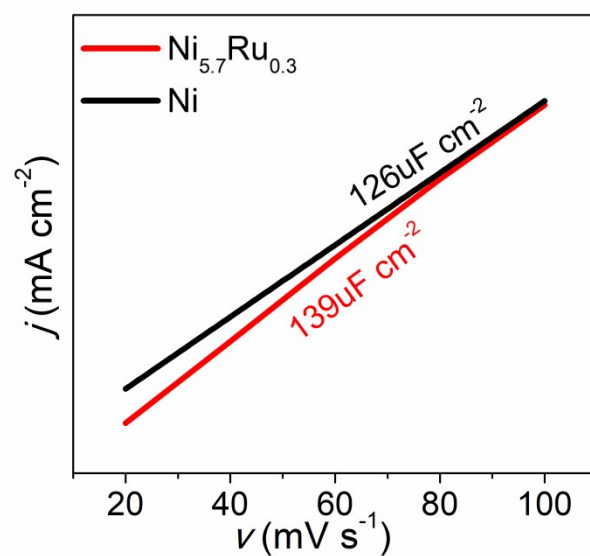

**Fig. S20.** The corresponding linear fitting of the capacitive current densities against the scan rates.

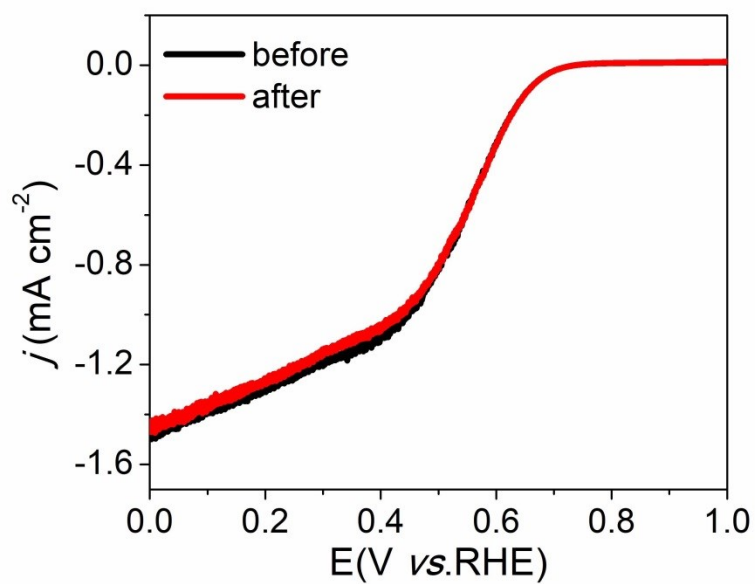

**Fig. S21.** Effects of 1mM KSCN addition on ORR activity of  $[\text{Ni}_6(\text{HHTP})_3(\text{H}_2\text{O})_x]_n$ .

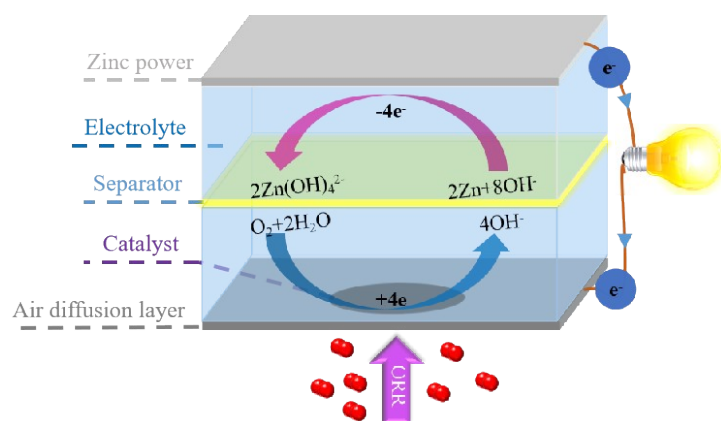

**Fig. S22.** Basic configuration of Zn-air battery including catalyst and the internal ORR process.

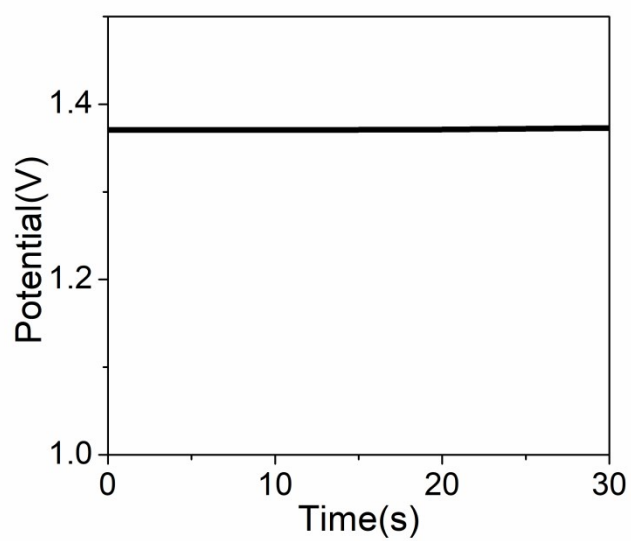

**Fig. S23.** The graph of liquid Zn-air battery based on  $[\text{Ni}_{5.7}\text{Ru}_{0.3}(\text{HHTP})_3(\text{H}_2\text{O})_x]_n$  with a steady open circuit voltage of 1.37 V.



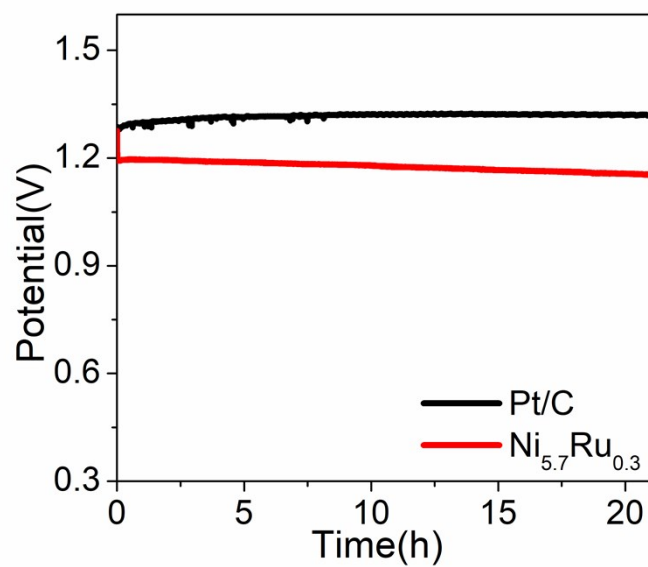

**Fig. S24.** The discharge curves under  $1 \text{ mA cm}^{-2}$ .

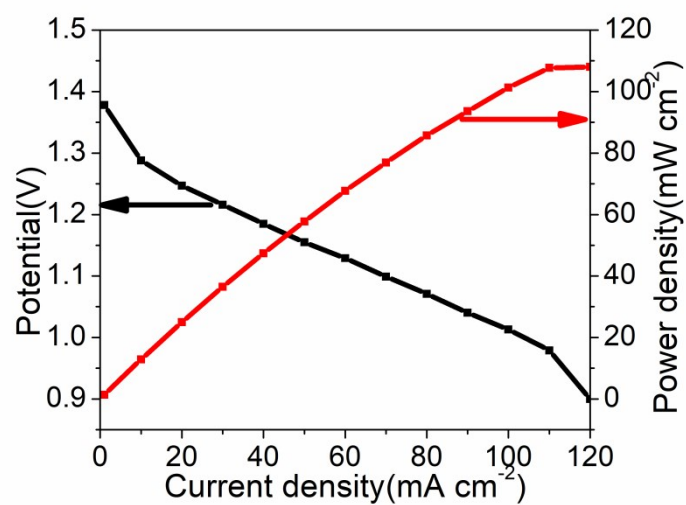

**Fig. S25.** Discharge polarization and power density curve of primary liquid Zn-air batteries based on Pt/C.

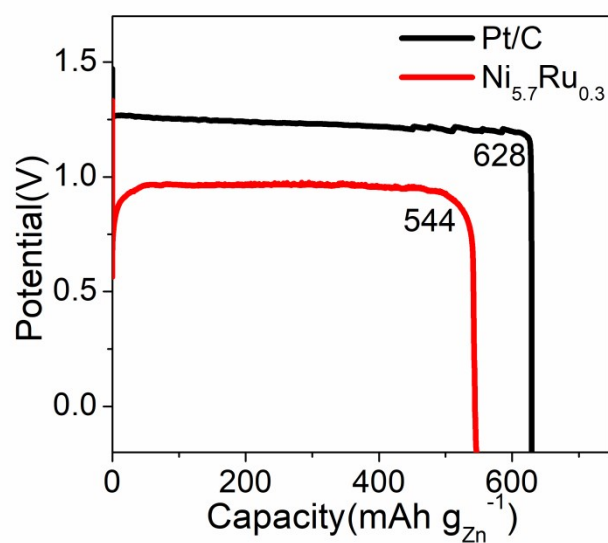

**Fig. S26.** Specific capacities of primary liquid Zn-air battery using  $[\text{Ni}_{5.7}\text{Ru}_{0.3}(\text{HHTP})_3(\text{H}_2\text{O})_x]_n$  or Pt/C as ORR catalyst.

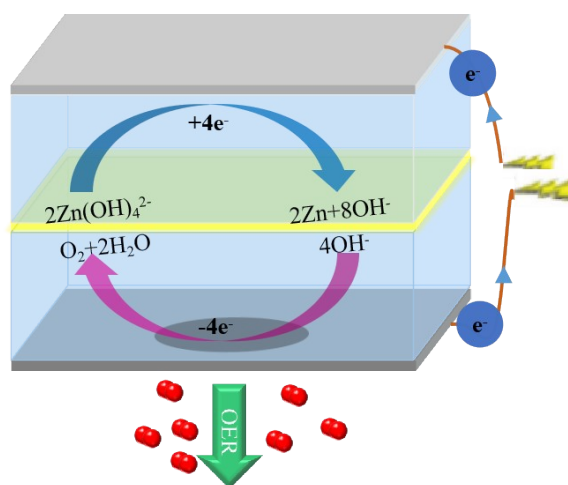

**Fig. S27.** Basic configuration of Zn-air battery including catalyst and the internal OER process.

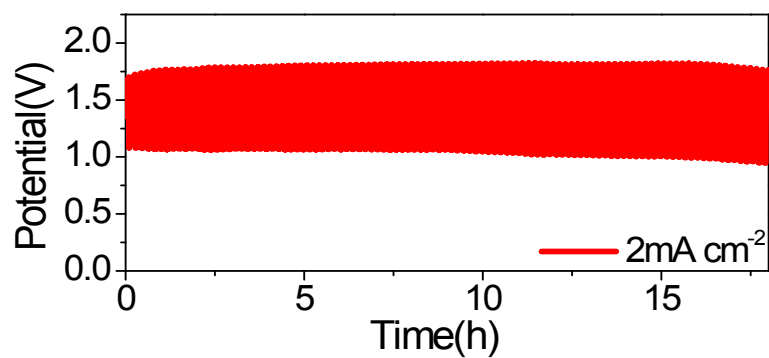

**Fig. S28.** Discharge/charge cycling curves of liquid Zn-air batteries using  $[\text{Ni}_{5.7}\text{Ru}_{0.3}(\text{HHTP})_3(\text{H}_2\text{O})_x]_n$  as the bifunctional air electrodes at a current density of  $2 \text{ mA cm}^{-2}$ .

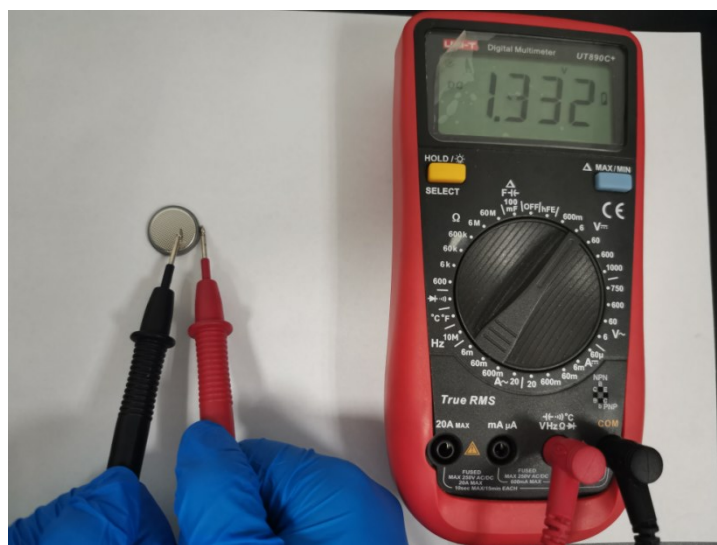

**Fig. S29.** Photograph of the all-solid-state Zn-air battery with a steady open circuit voltage of 1.332 V.

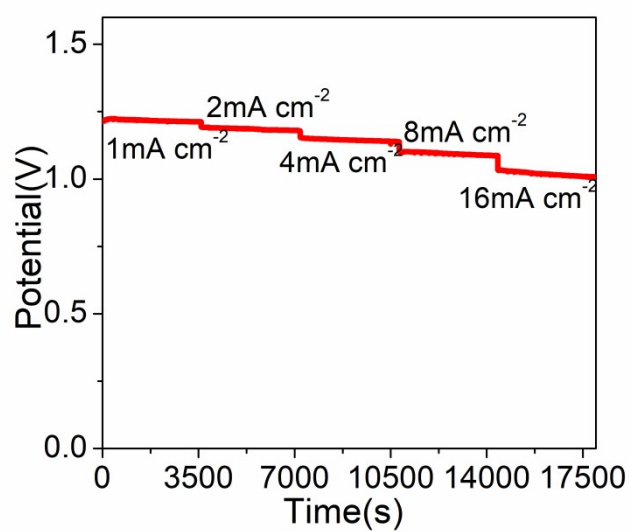

**Fig. S30.** The rate performance of the all-solid-state Zn-air battery based on  $[\text{Ni}_{5.7}\text{Ru}_{0.3}(\text{HHTP})_3(\text{H}_2\text{O})_x]_n$  under different current densities.

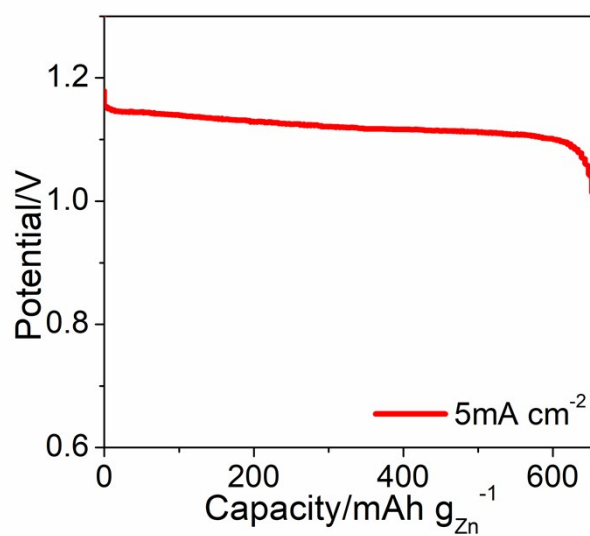

**Fig. S31.** Specific capacity of the all-solid-state Zn-air battery based on  $[\text{Ni}_{5.7}\text{Ru}_{0.3}(\text{HHTP})_3(\text{H}_2\text{O})_x]_n$  at  $5 \text{ mA cm}^{-2}$ .

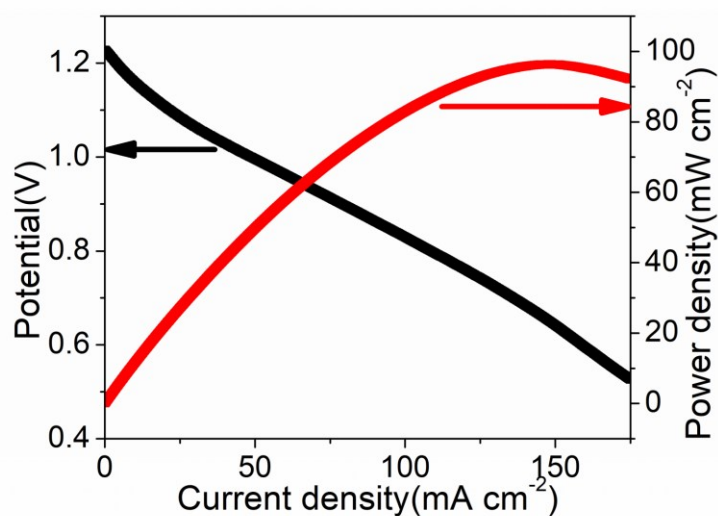

**Fig. S32.** Polarization and power density curves of the all-solid-state Zn-air battery based on  $[\text{Ni}_{5.7}\text{Ru}_{0.3}(\text{HHTP})_3(\text{H}_2\text{O})_x]_n$ .

**Table S2.** Comparison of conductivity with the reported conductive MOFs.

| Samples                                                                   | Conductivity [ $\text{S m}^{-1}$ ] | Journal name/Time                               |
|---------------------------------------------------------------------------|------------------------------------|-------------------------------------------------|
| $[\text{Ni}_6(\text{HHTP})_3(\text{H}_2\text{O})_x]_n$                    | 0.15                               | This work                                       |
| $[\text{Ni}_{5.7}\text{Ru}_{0.3}(\text{HHTP})_3(\text{H}_2\text{O})_x]_n$ | 0.05                               | This work                                       |
| $\text{Fe}(\text{1,2,3-triazolate})_2$                                    | $7.7 \times 10^{-3}$               | <i>Chem. Eur. J.</i> , 2012, 18, 10595-10601    |
| $\text{Co}_2(\text{TTFTB})$                                               | $1.5 \times 10^{-3}$               | <i>J. Am. Chem. Soc.</i> , 2015, 137, 1774-1777 |
| $\text{Cu}[\text{Cu}(\text{pdt})_2]$                                      | 0.06                               | <i>Inorg. Chem.</i> , 2009, 48, 9048-9050       |
| $\text{Pt}_3(\text{HTTP})_2$                                              | $10^{-4}$                          | <i>Chem. Commun.</i> , 2014, 50, 3986-3988      |
| NNU-27                                                                    | 0.13                               | <i>Chem. Commun.</i> , 2016, 52, 2019-2022      |

**Table S3.** Performance comparison of the batteries with the currently reported researches.

|  | Precursor/<br>Catalyst | Electrolyte<br>[ORR/OER/Zn-<br>O <sub>2</sub> ] | E <sub>10</sub><br>[V] | E <sub>1/2</sub> /<br>E <sub>onset</sub><br>[V] | Peak<br>power<br>density<br>[mW<br>cm <sup>-2</sup> ] | Specific<br>capacity<br>[mAh<br>g <sub>Zn</sub> <sup>-1</sup> ] | OCP | Cycling<br>stability/<br>Cycle<br>current<br>density | Journal<br>name/Time |
|--|------------------------|-------------------------------------------------|------------------------|-------------------------------------------------|-------------------------------------------------------|-----------------------------------------------------------------|-----|------------------------------------------------------|----------------------|
|--|------------------------|-------------------------------------------------|------------------------|-------------------------------------------------|-------------------------------------------------------|-----------------------------------------------------------------|-----|------------------------------------------------------|----------------------|

|   |                                                                                                         |                                                            |       |            |      |     |       |                                          |                                                               |
|---|---------------------------------------------------------------------------------------------------------|------------------------------------------------------------|-------|------------|------|-----|-------|------------------------------------------|---------------------------------------------------------------|
| 1 | [Ni <sub>5.7</sub> Ru <sub>0.3</sub> (HHTP) <sub>3</sub> (H <sub>2</sub> O) <sub>x</sub> ] <sub>n</sub> | 0.1 M KOH / 0.1 M KOH / 6 M KOH +0.2 M Zn(Ac) <sub>2</sub> | 1.62  | 0.68       | 76   | 544 | 1.37  | 110 cycles /2 mA cm <sup>-2</sup>        | This work                                                     |
| 2 | [Co <sub>3</sub> (HHTP) <sub>2</sub> ] <sub>n</sub>                                                     | 0.1 M KOH                                                  | 1.72  |            |      |     |       |                                          | Chem. Commun., 2018, 54, 13579--13582                         |
| 3 | Fe-MOF                                                                                                  | 1 M KOH                                                    | 1.673 |            |      |     |       |                                          | <i>J. Mater. Chem. A</i> , 2020, 8, 3658-3666                 |
| 4 | Ni-Cu(BDC)/GC                                                                                           | 1 M KOH                                                    | 1.605 |            |      |     |       |                                          | <i>New J. Chem.</i> , 2020, 44, 2459-2464                     |
| 5 | ZIF-67                                                                                                  | 1 M KOH                                                    | 1.631 |            |      |     |       |                                          | <i>Small</i> , 2018, 1803576                                  |
| 6 | 6%Fe-N-S CNN                                                                                            | 0.1 M KOH                                                  |       | 0.91       | 132  | 700 | 1.37  |                                          | <i>Applied Catalysis B: Environmental</i> 1250 (2019) 143–149 |
| 7 | 3D HNG                                                                                                  | 0.1 M KOH / 0.1 M KOH / 6 M KOH +0.2 M Zn(Ac) <sub>2</sub> | 1.69  | /0.95      | 68   | 790 |       | 140 cycles /2 mA cm <sup>-2</sup>        | <i>Small Methods</i> 2018, 2, 1800144                         |
| 8 | Co-Ni-S@N SPC                                                                                           | 0.1M KOH / 0.1M KOH / 6.0M KOH + 0.2M Zn(Ac) <sub>2</sub>  | 1.7   | 0.82       | 51.6 |     | 1.539 | 60h (180 cycles) /10 mA cm <sup>-2</sup> | <i>Carbon</i> 146 (2019) 476-485                              |
| 9 | Co@Co <sub>3</sub> O <sub>4</sub> @NC-                                                                  | 0.1M KOH / 1 M KOH                                         | 1.60  | 0.8 / 0.94 | 64   | 685 | 2.2   | 100 cycles(200h) / 5                     | <i>J. Mater. Chem. A</i> , 2018, 6,                           |

|    |                                                         |                                                                            |           |                 |  |     |      |                                                    |                                                    |
|----|---------------------------------------------------------|----------------------------------------------------------------------------|-----------|-----------------|--|-----|------|----------------------------------------------------|----------------------------------------------------|
|    | 900                                                     | /6M<br>KOH                                                                 |           |                 |  |     |      | mA cm <sup>-2</sup>                                | 1443–1453                                          |
| 10 | N, P /<br>CoS <sub>2</sub><br>@TiO <sub>2</sub><br>NPFs | 0.1M<br>KOH /<br>0.1 M<br>KOH                                              | 1.49      | 0.91/0<br>.71   |  | 610 | 1.31 | 200 cycles<br>(133 h) /10<br>mA cm <sup>-2</sup>   | <i>Adv. Funct.<br/>Mater.</i> 2018,<br>28, 1804540 |
| 11 | Ni <sub>3</sub> Fe/<br>N-C<br>sheets                    | 0.1M<br>KOH /<br>0.1M<br>KOH /<br>0.2M<br>ZnCl <sub>2</sub> +<br>6M KOH    | 1.60      | 0.90            |  | 528 |      | 105<br>cycles(420<br>h) /10 mV<br>cm <sup>-2</sup> | <i>Adv. Energy<br/>Mater.</i> 2017,<br>7, 1601172  |
| 12 | NiFe-<br>LDH/<br>Co,N-<br>CNF                           | 0.1M<br>KOH /<br>0.1M<br>KOH /<br>6M KOH<br>+ 0.2 M<br>Zn(Ac) <sub>2</sub> | 1.54<br>2 | 0.790<br>/0.893 |  |     |      | 80 h /25 mA<br>cm <sup>-2</sup>                    | <i>Adv. Energy<br/>Mater.</i> 2017,<br>7, 1700467  |

## References

S1 M. Hmadeh, Z. Lu, Z. Liu, F. Gándara, H. Furukawa, S. Wan, V. Augustyn, R. Chang, L. Liao, F. Zhou, E. Perre, V. Ozolins, K. Suenaga, X. Duan, B. Dunn, Y. Yamamoto, O. Terasaki and O. M. Yaghi, *Chem. Mater.*, 2012, **24**, 3511–3513.
